# Supplementary material
Source: PubMed Central journal article supplement (PMC8105283)
Supplement: NIHMS1683074-supplement-3.pdf [file NIHMS1683074-supplement-3.pdf]

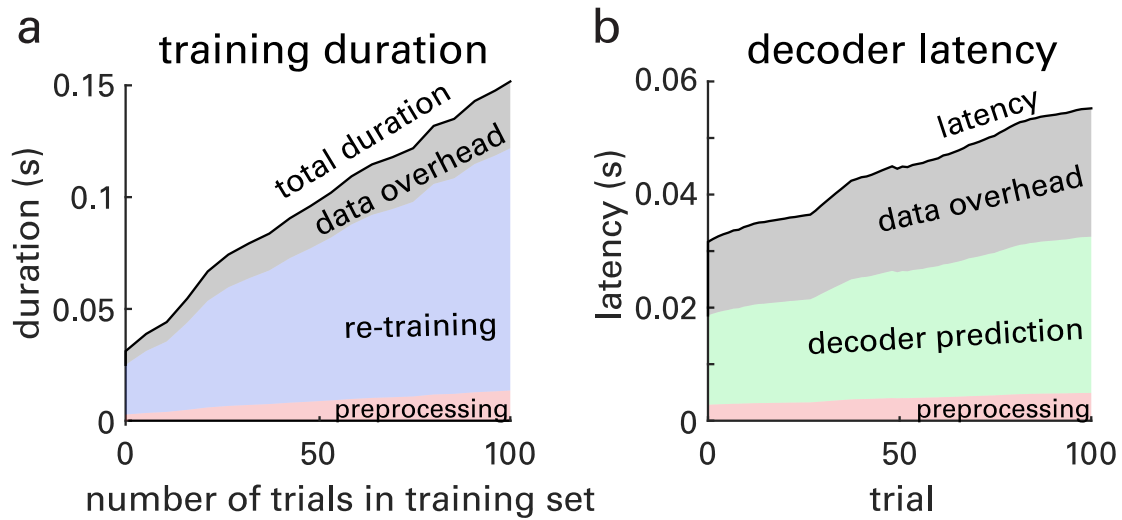

**Figure S1 (related to Figure 4 and Supplemental Video 1)| Real time decoder timing. a,** Time required to train or re-train the classifier as a function of the number of trials in the training set. Duration is further divided into its major processes: preprocessing, training or re-training, and data overhead. **b,** Time required to predict a behavioral variable for a single trial as a function of the trial number (decoder latency). The decoder latency is further divided into preprocessing, decoder prediction, and data overhead. These data were acquired on a standard desktop PC using a single processing core of an Intel core i7-7700k at 3.60 GHz. Parallel processing methods could further decrease latencies.
